# Supplementary material for: MET Suppresses Epithelial VEGFR2 via Intracrine VEGF-induced Endoplasmic Reticulum-associated Degradation
Source: PubMed Central journal article supplement — eBioMedicine. 2015 Mar 28;2(5):406–20. doi: 10.1016/j.ebiom.2015.03.021 (PMC4486192; doi:10.1016/j.ebiom.2015.03.021), 2015-03-28
Supplement: mmc2.pdf [file mmc2.pdf]

**Sup Figure 1.**

**A MET IHC**

Adenocarcinoma

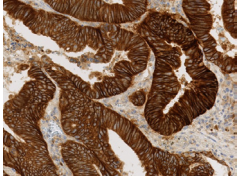

**B**

Adenocarcinoma

Squamous Cell Carcinoma

VEGFR2 IHC

VEGFR2 ISH

Bright Field

anti-sense

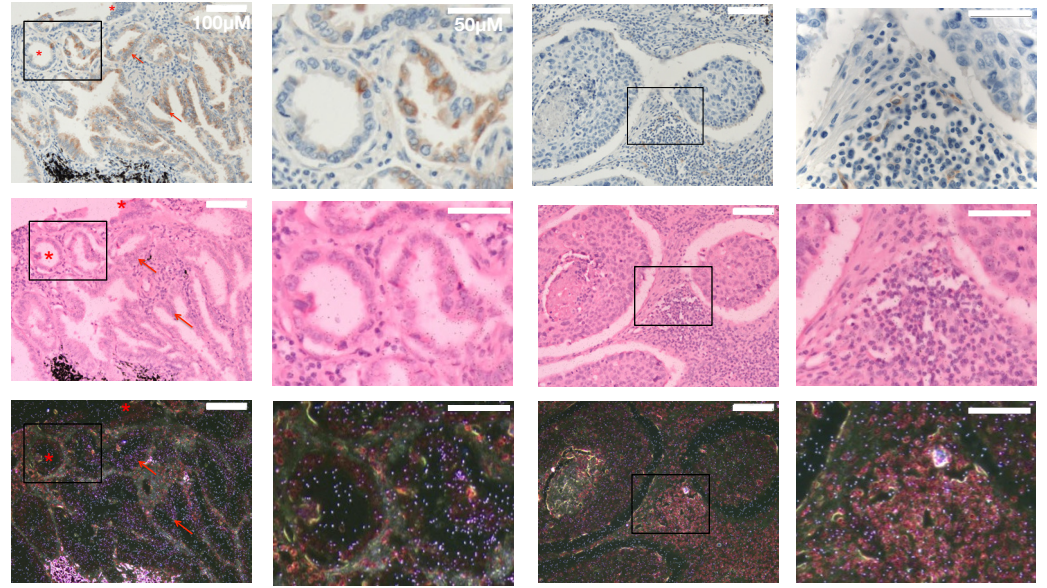

\*Negative, Arrow: positive

**C**

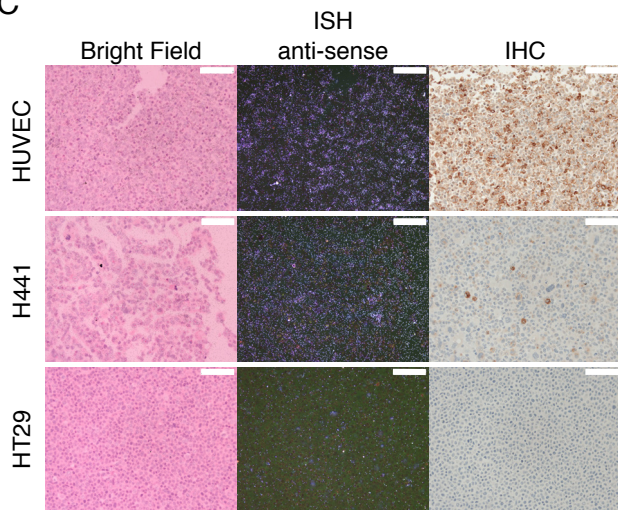

**D**

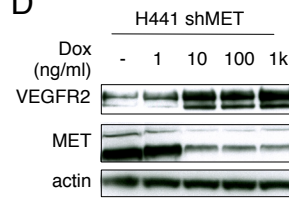

**F**

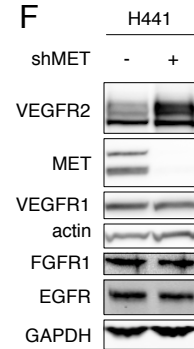

**E**

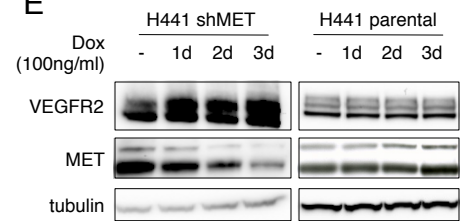

**G**

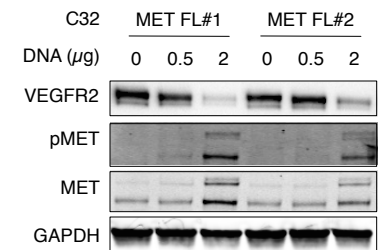

**Figure S1.** Expression of MET and VEGFR2 in tumors and effect of MET knockdown on VEGFR2 levels. IHC analysis of MET expression in epithelial cells in NSCLC adenocarcinoma (A) and VEGFR2 expression in endothelial cells in NSCLC squamous cell carcinoma. Brown chromogen indicates signal (B, top panels). (B, middle and bottom panels) ISH analysis of the same region shows mRNA expression of MET and VEGFR2 in NSCLC adenocarcinoma, but not squamous cell carcinoma. Silver Grains (White dots) indicate signal. \* denotes negative staining, arrow indicates positive staining. Higher magnifications of the boxed areas are shown on the right. (C) ISH and IHC analysis of HUVEC, H441 and HT29 cells. Scale bar is 100 $\mu$ m. (D) H441 shMET cells were treated with doxycyclin (dox) at the indicated concentration over 48 hr and VEGFR2 and MET levels were analyzed by immunoblot. (E) H441 parental and shMET clones were treated with 100 ng/ml dox for the indicated duration. VEGFR2 and MET were analyzed by immunoblot. (F) Effect of MET knockdown on the indicated cell surface receptor levels in H441 cells. (G) C32 cells were transfected with full-length MET cDNA expression constructs driven by CMV or TK-Neo at the indicated amount over 48 hr and VEGFR2, pMET and MET levels were analyzed by IB.

# Sup Figure 2.

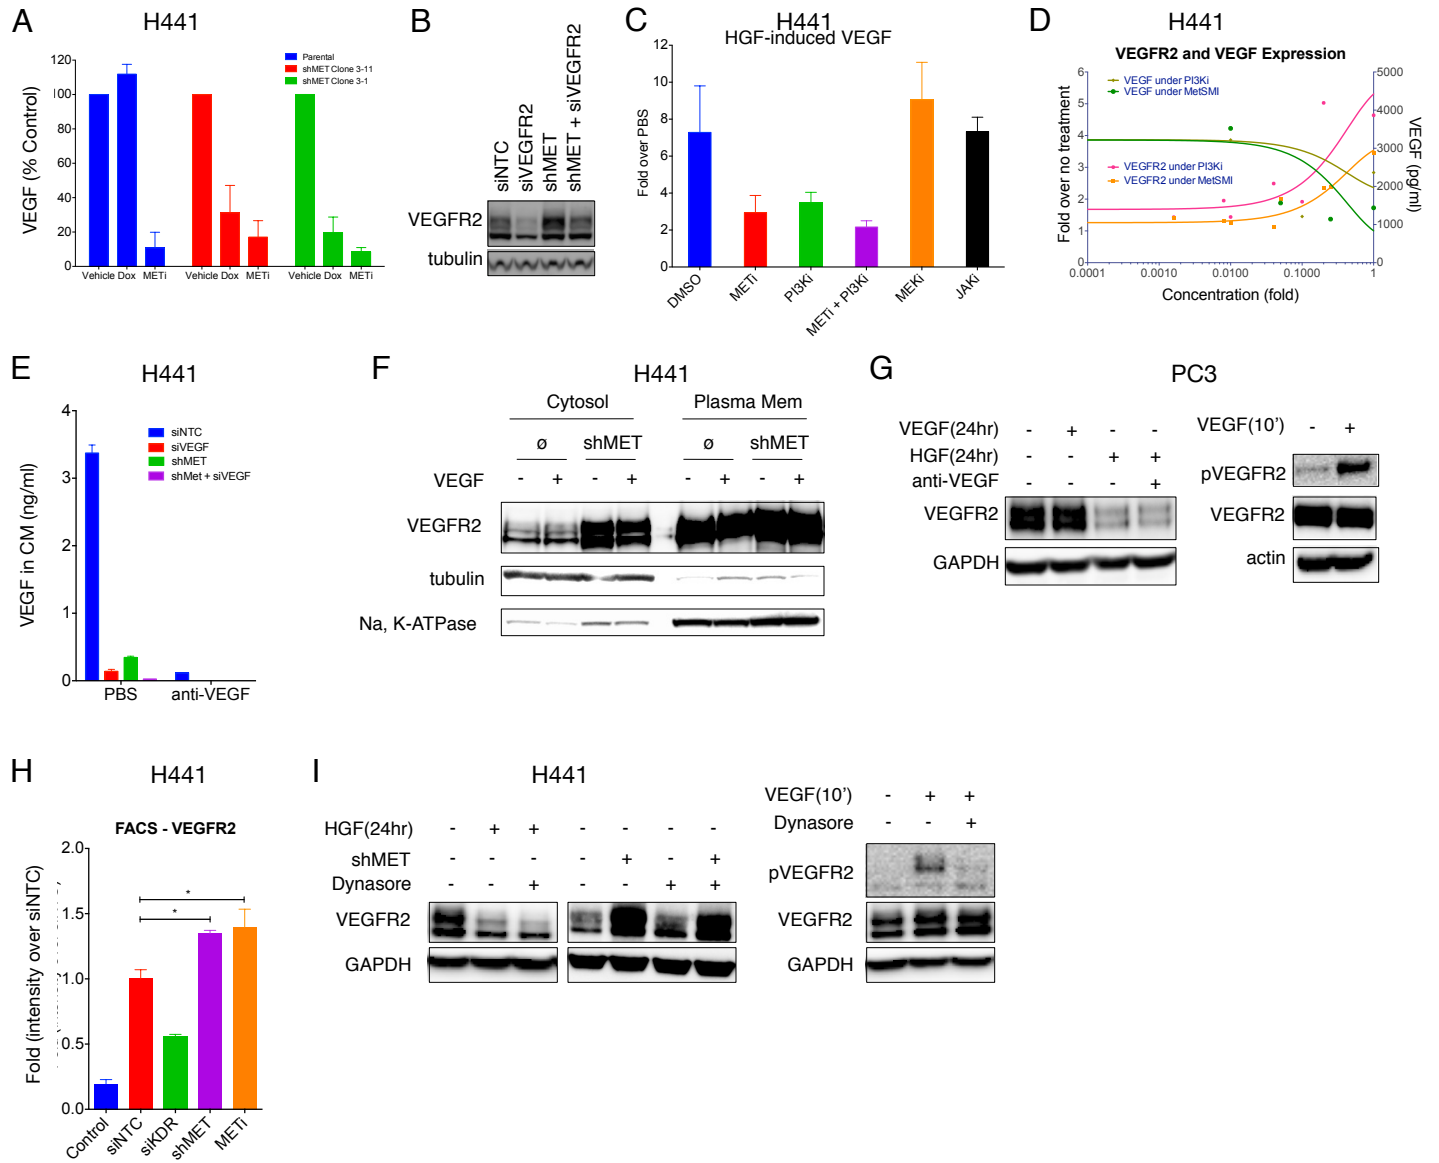

**Figure S2.** MET suppresses VEGFR2 via PI3K-induced intracrine VEGF action. (A) Effect of MET knockdown (shMET) or inhibition (GDC-0712, 1  $\mu$ M) on VEGF levels in wildtype H441 cells or shMET-expressing clones. (B) VEGFR2 IB verifying knockdown with VEGFR2 siRNA as shown in Figure 2B. (C) VEGF levels based on VEGF ELISA readings in Figure 2D. The numbers indicate fold change for HGF-over vehicle-treated cells. (D) Relationship of VEGFR2 levels and secreted VEGF levels as a function of MET and PI3K SMI concentration. Results are based on densitometric analyses of VEGFR2 and on VEGF ELISA results of cell supernatants from the same study (data are normalized in pair-wise fashion to untreated controls). The lines are based on a non-linear fit for each data set. (E) VEGF ELISA results for cells subjected to siRNA or shRNA knockdown as indicated, in the presence or absence of anti-VEGF. (F) Subcellular fractionation of H441 shMET clones grown in the absence or presence of doxycyclin and treated with VEGF (100 ng/ml) for 15 min. VEGFR2 as well as the respective markers against each compartment were then measured by immunoblot. (G, left) Effect of VEGF (100 ng/ml) or HGF (100 ng/ml) or anti-VEGF (10  $\mu$ g/ml) on VEGFR2 expression in PC3 cells. Phosphorylation assay of PC3 cells subjected to a 10 min treatment with VEGF (right). (H) FACS analysis of VEGFR2 positive cells under indicated condition. Bar graph depicts the mean data of three individual experiments, with normalization to control siNTC. Error bars indicate S.E.M., \* $p < 0.05$  for indicated comparison. (I) Immunoblot analysis of VEGFR2 for H441 cells with or without MET knockdown (shMET) treated with HGF (100 ng/ml) for 24 hr in the absence or presence of dynasore (80  $\mu$ M). Right panel, H441 shMET clones incubated with or without VEGF for 10 min in absence or presence of dynasore were analyzed by immunoblot.



# Sup Figure 3.

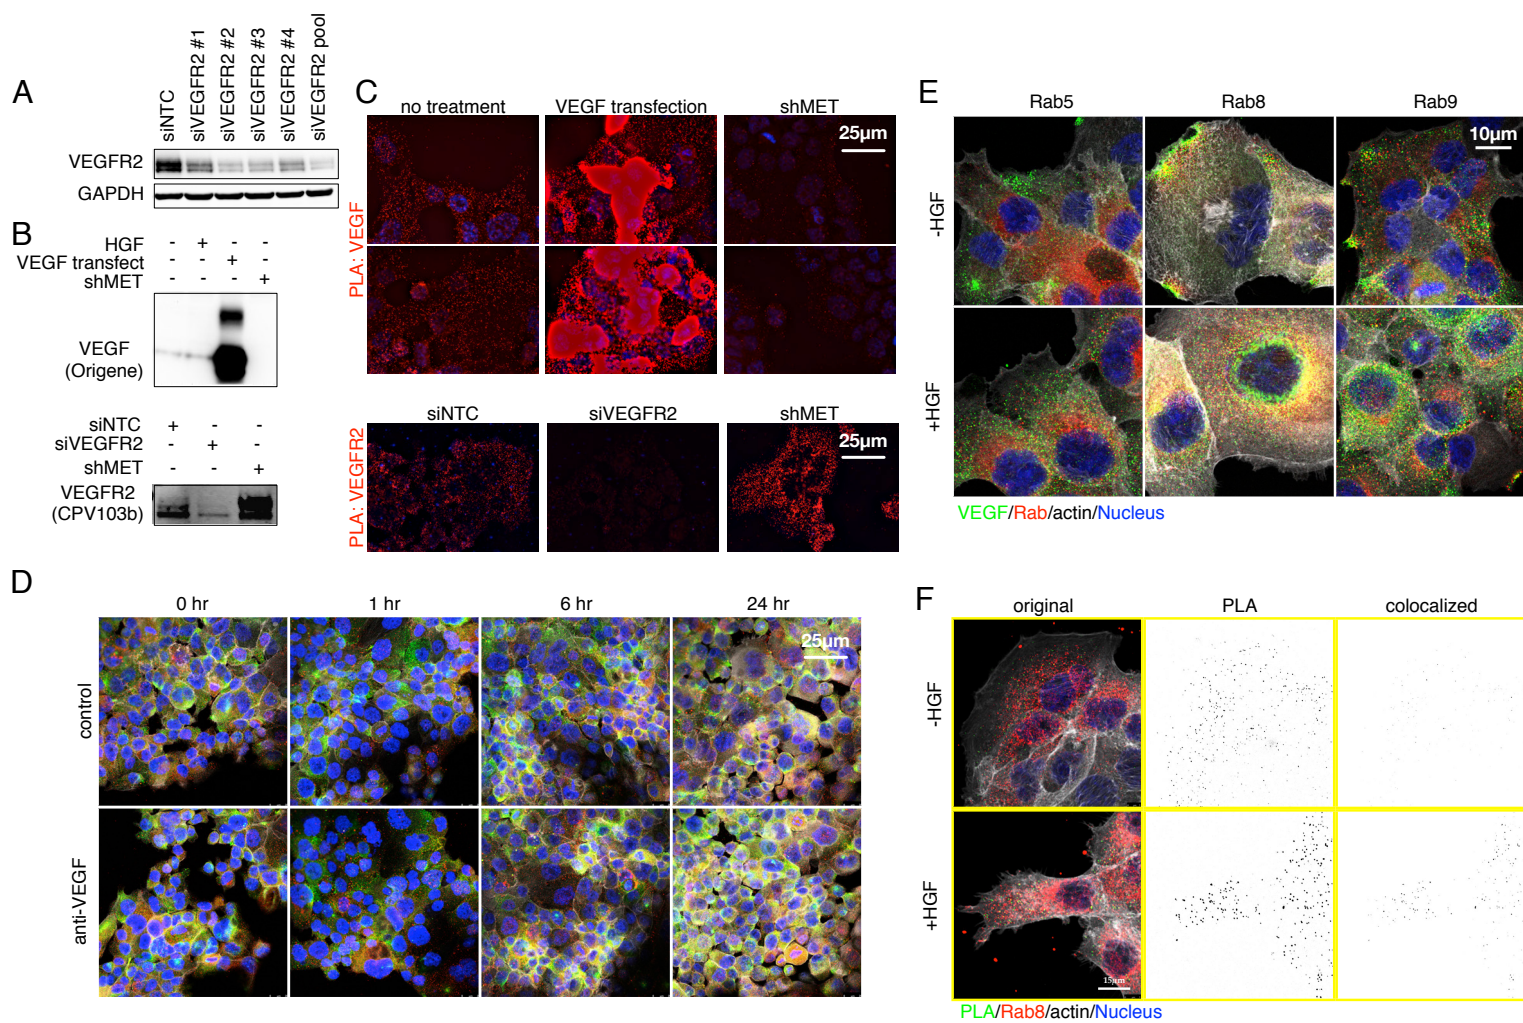

**Figure S3.** HGF induces close intracellular association of VEGF and VEGFR2. (A) Immunoblot of VEGFR2 verifying knockdown with individual or pooled VEGFR2 siRNAs. (B) Immunoblot detection of VEGF (top) or VEGFR2 (bottom) under each indicated condition in H441 cells. (C) PLA analysis of VEGF or VEGFR2 alone in the context of each indicated treatment in H441 cells. (D) Immunofluorescence analysis of H441 cells treated for indicated time with 100 ng/ml HGF, in the absence or presence of anti-VEGF, and stained for VEGF and VEGFR2 protein (VEGF in pseudo-green, VEGFR2 in pseudo-red, nucleus with DAPI in blue). (E) Immunocytochemical staining of H441 cells incubated for 24 hr in the absence or presence of HGF (100 ng/ml): actin with phalloidin (white), VEGF (green) and Rab (red) with specific antibodies, nuclei with DAPI (blue). (F) Computer-generated images for PLA and Rab8 colocalization depicted in Figure 3E were used for quantitation of total PLA signal (middle, VEGF:VEGFR2 complex) and to identify colocalized signals (right, VEGF:VEGFR2:Rab8 complex).

# Sup Figure 4.

**A**

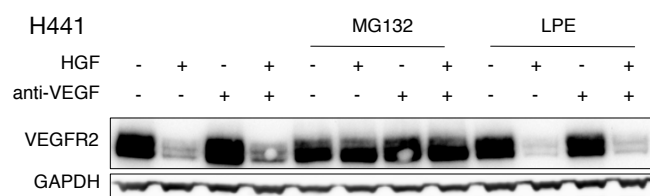

**B**

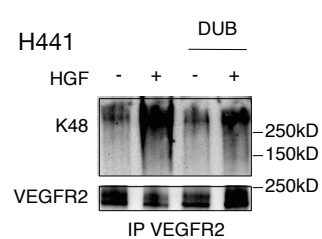

**C**

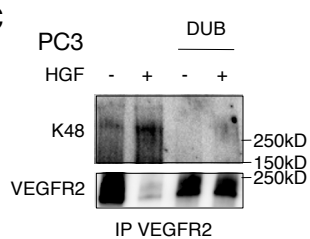

**D**

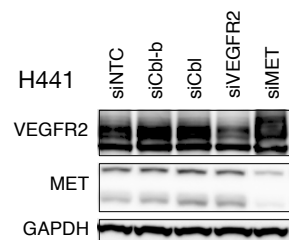

**E**

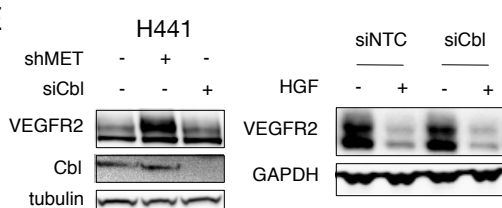

**Figure S4.** Cbl is dispensable for suppression of VEGFR2 by MET. (A) Effect of proteasome or lysosome inhibitors on HGF modulation of VEGFR2. H441 cells were treated with HGF (100 ng/ml) with or without anti-VEGF (10  $\mu$ g/ml) for 24 hr in absence or presence of MG132 (10  $\mu$ M) or LPE (10  $\mu$ M) and VEGFR2 levels were analyzed by IB. (B and C) H441 (B) or PC3 cells (C) were treated with or without HGF (100 ng/ml). Cell lysates were subjected to VEGFR2 IP under denaturing conditions followed by in vitro deubiquitination by a cocktail of human recombinant deubiquitinases (see Supplemental Materials and Methods). Samples were then analyzed by IB with K48-ubiquitin and VEGFR2 antibodies. (D) Effect of siRNA knockdown of Cbl-b, Cbl, VEGFR2 and MET on VEGFR2 and MET levels in H441 cells. (E, left) Effect of MET shRNA knockdown (shMET) or Cbl siRNA knockdown (siCbl) on VEGFR2 levels in H441 cells. (F, right) H441 cells were treated with or without HGF (100 ng/ml) for 24 hr in the context of scrambled (siNTC) or Cbl siRNA knockdown (siCbl). VEGFR2 level were analyzed by immunoblot.



Sup Figure 5.

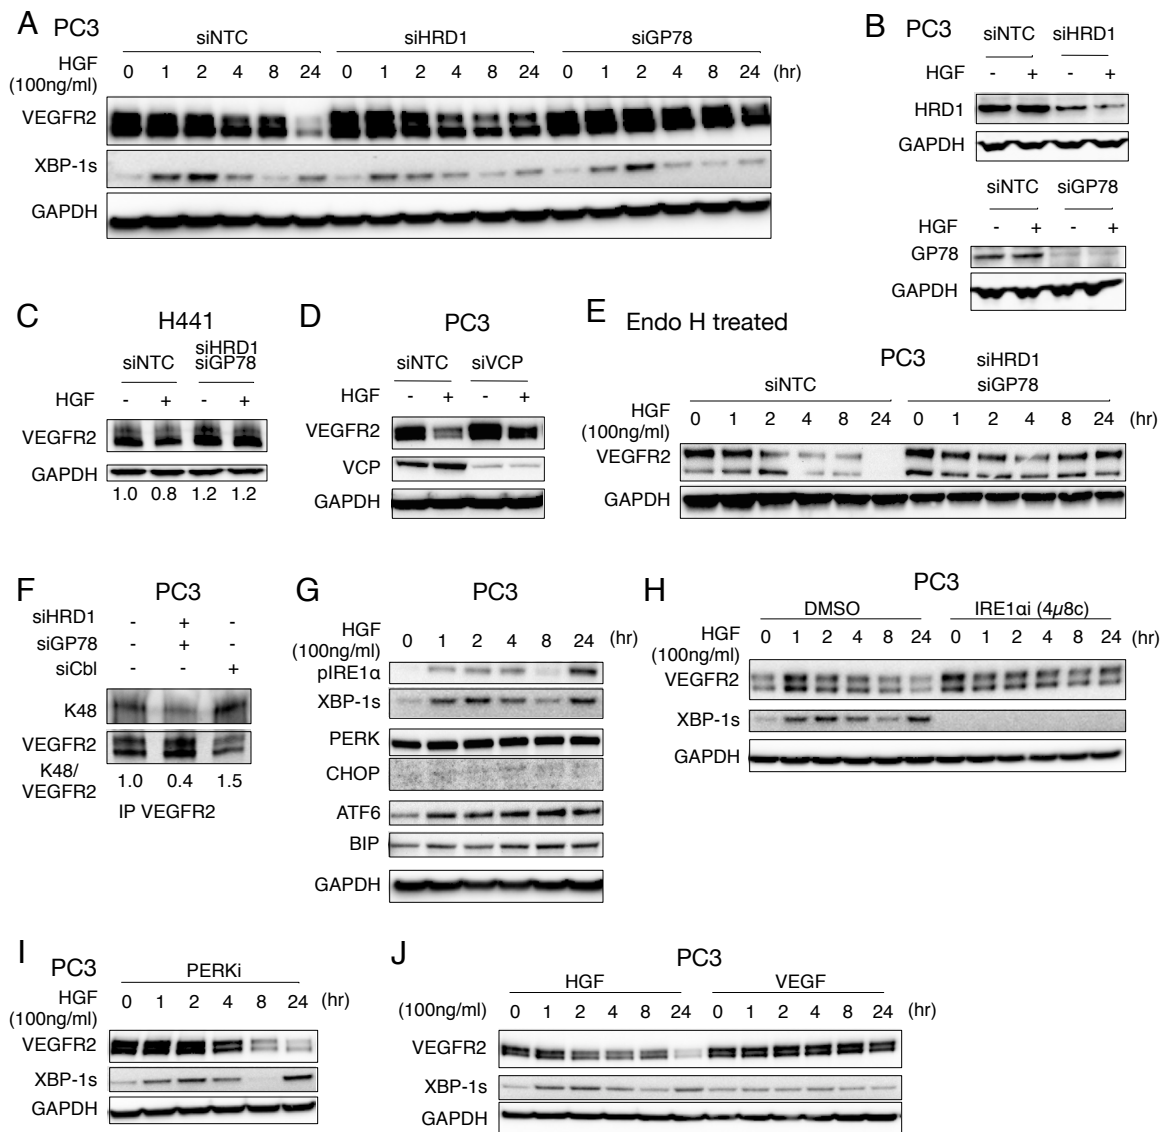

**Figure S5.** ERAD-linked E3 ligases and IRE1 $\alpha$  mediate VEGFR2 disposal. (A) PC3 cells were transfected with non-targeted control siRNA (siNTC), or siRNA targeted against gp78 (siGP78) or HRD1 (siHRD1) and treated with 100 ng/ml HGF for the indicated time period. Samples were then analyzed by IB for VEGFR2 and XBP-1s expression. (B) Same as (A) for the presence of HRD1 (top) or gp78 (bottom). (C) Effect of combined HRD1 and gp78 combo knockdown on VEGFR2 modulation by HGF (100 ng/ml, 24 hr) in H441 cells. Numbers at the bottom of the Immunoblot indicate densitometric quantification. (D) PC3 cells were transfected with siNTC or siRNA against p97/VCP (siVCP) and treated with or without 100 ng/ml HGF for 24 hr. Samples were analyzed by IB for VEGFR2 and VCP. (E) Same samples as in Figure 5C but treated with Endo H and analyzed by IB. (F) Effect of Cbl, or combined gp78 and HRD1 siRNA knockdown on levels of K48-linked VEGFR2 in PC3 cells. Numbers at the bottom indicate densitometric quantification. (G) PC3 cells were exposed to HGF for the indicated period of time. Samples were then analyzed by IB as indicated. (H) PC3 cells were exposed to HGF for the indicated time in the presence of either vehicle (DMSO) or 1  $\mu$ M IRE1 $\alpha$  SMI 4 $\mu$ 8c. VEGFR2 and XBP-1s were analyzed by immunoblot. (I) PC3 cells were treated as in (G) but under PERK inhibition (PERKi, 1  $\mu$ M). (J) PC3 cells were treated with HGF or VEGF for the indicated time period. VEGFR2 and XBP-1s were then analyzed by IB.

Sup Figure 6.

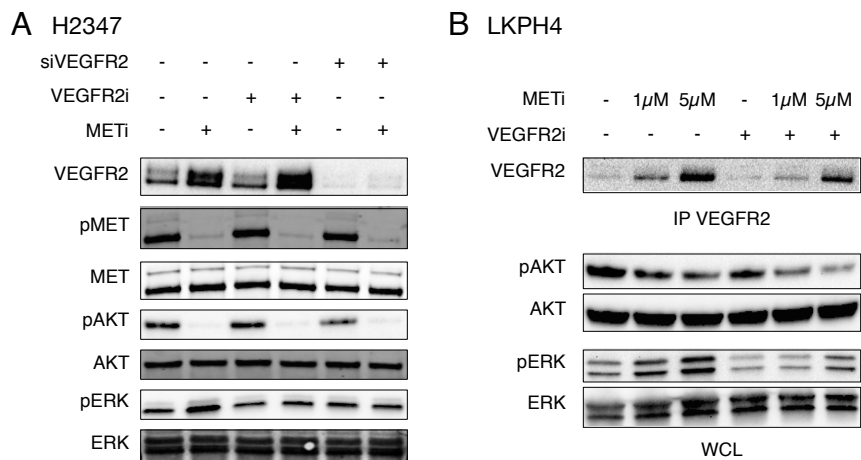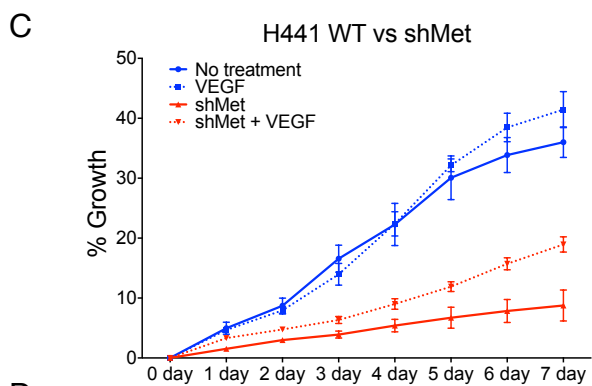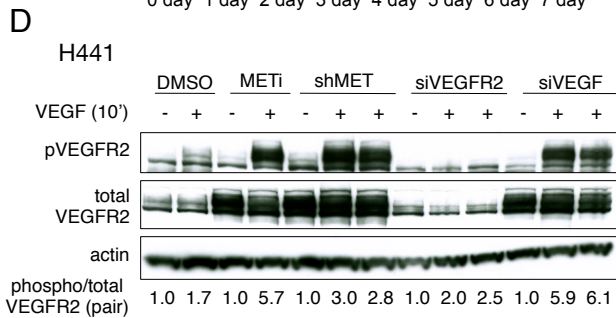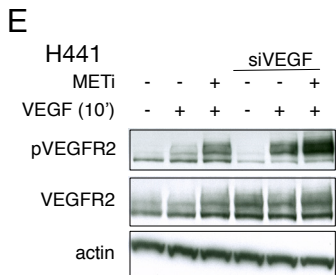

**Figure S6.** MET disruption enhances responsiveness to exogenous VEGF. (A) Effect of VEGFR2 kinase inhibitor (VEGFR2i, 4  $\mu$ M) or VEGFR2 siRNA knockdown (siVEGFR2) on VEGFR2 and on phosphorylation of downstream markers upon MET inhibition (GDC-0712, 1  $\mu$ M) in H2347 cells. (B) Effect of VEGFR2 kinase inhibitor (VEGFR2i, 4  $\mu$ M) on VEGFR2 and on phosphorylation of downstream markers upon MET inhibition (METi) in LKPH4 cells. (C) Analysis of H441 cell growth over 7 days in serum-free medium using an incucyte instrument. Cells were incubated and monitored without treatment or in the presence of exogenous VEGF (100 ng/ml). Cells were also subjected to MET knockdown as indicated (shMET). (D) Same as 6G but with comparison to siRNA knockdown of VEGFR2 or VEGF and the corresponding effects on phospho-VEGFR2 and total VEGFR2 levels by immunoblot. (E) H441 cells were treated with vehicle or VEGF (100 ng/ml) for 10 min under the indicated condition and phospho-VEGFR2 and total VEGFR2 levels were analyzed by immunoblot.

# Sup Figure 7.

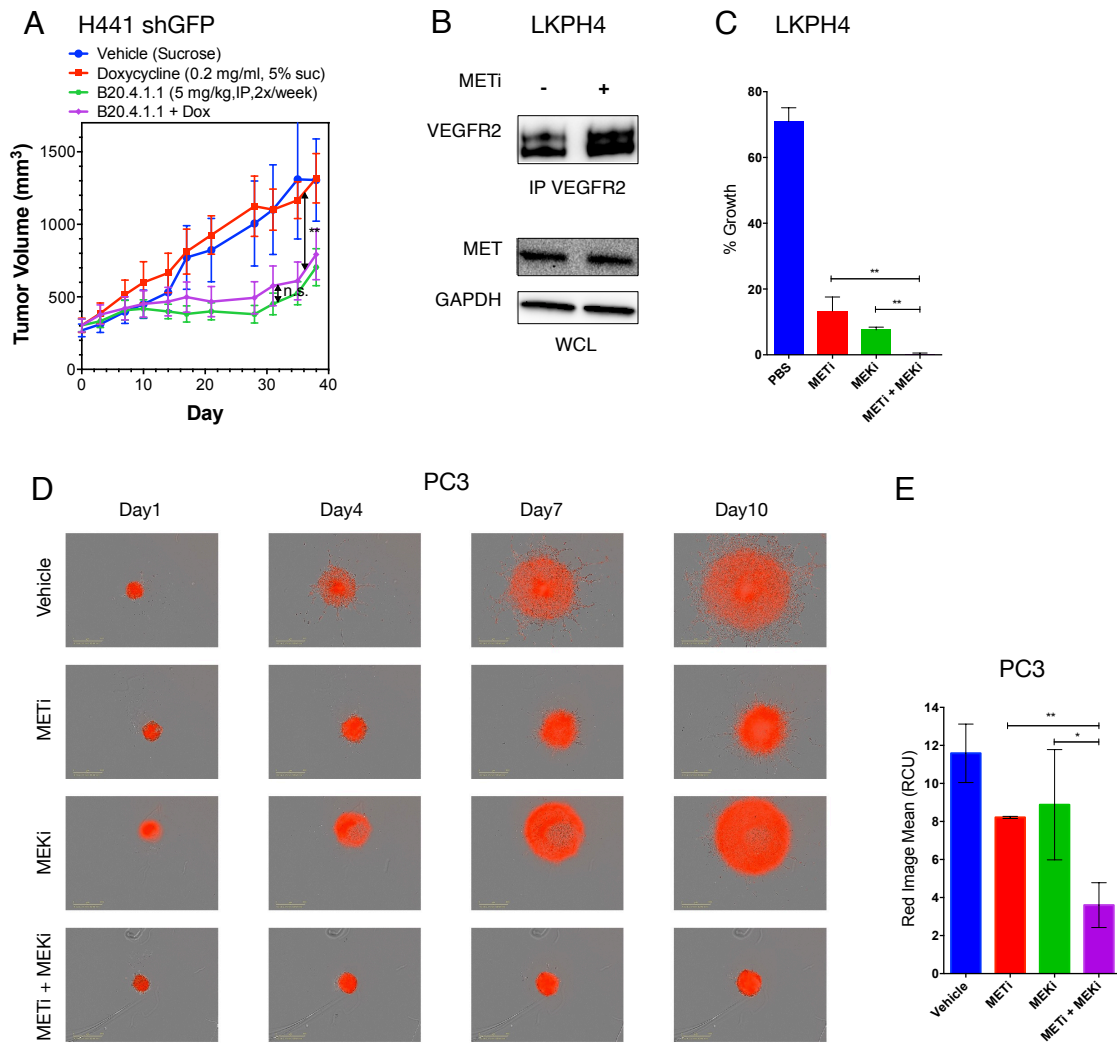

**Figure S7.** Combined inhibition of MET and MEK blocks cell growth. (A) Effect of Doxycycline treatment, VEGF neutralization, or both on in vivo tumor growth of shGFP-harboring H441 cells as a control for shMET-harboring H441 cells in Figure 7A. (B) LKPH4 cells were treated with or without GDC-0712 (1  $\mu$ M) and VEGFR2 and MET were analyzed by IB. (C) LKPH4 cells were subjected to SMI blockade of MET (GDC-0712, 1  $\mu$ M) or MEK (cobimetinib, 1  $\mu$ M) or both and analyzed for growth at 72 hr. Error bars indicate S.E.M., n = 5; \*\*p < 0.01 for indicated comparison. (D) Images for NuCLight Red-labeled PC3 cells grown in 3D culture under treatment with vehicle, GDC-0712 (1  $\mu$ M), cobimetinib (1  $\mu$ M) or both inhibitors. (E) Quantitative analysis of Day-10 cell growth for (D). Error bars indicate S.E.M., n = 3; \*p < 0.05, \*\*p < 0.01 for indicated comparison.
